1 **Title: Association between willingness to receive the COVID-19 vaccine and**  
2 **sources of health information among Japanese workers: a cohort study**

3

4 **Running title: COVID-19 vaccine and sources of health information**

5

6 Ko Hiraoka<sup>1</sup>, MD; Tomohisa Nagata<sup>1</sup>, MD, PhD; Takahiro Mori<sup>1</sup>, MD, MOH; Hajime  
7 Ando<sup>2</sup>, MD, MOH, PhD; Ayako Hino<sup>3</sup>, MD, PhD; Seiichiro Tateishi<sup>4</sup>, MD, PhD;  
8 Mayumi Tsuji<sup>5</sup>, MD, PhD; Shinya Matsuda<sup>6</sup>, M.D, PhD; Yoshihisa Fujino<sup>7</sup>, MD, MPH,  
9 PhD; for the CORoNaWork project

10

11 Affiliations:

12 1 Department of Occupational Health Practice and Management, Institute of Industrial  
13 Ecological Sciences, University of Occupational and Environmental Health, Japan

14 2 Department of Work Systems and Health, Institute of Industrial Ecological Sciences,  
15 University of Occupational and Environmental Health, Japan

16 3 Department of Mental Health, Institute of Industrial Ecological Sciences, University  
17 of Occupational and Environmental Health, Japan

18 4 Department of Occupational Medicine, School of Medicine, University of  
19 Occupational and Environmental Health, Japan

20 5 Department of Environmental Health, School of Medicine, University of  
21 Occupational and Environmental Health, Japan

22 6 Department of Public Health, School of Medicine, University of Occupational and  
23 Environmental Health, Japan

24 7 Department of Environmental Epidemiology, Institute of Industrial Ecological

25 Sciences, University of Occupational and Environmental Health, Japan

26 **Correspondence:** T. Nagata, Department of Occupational Health Practice and  
27 Management, Institute of Industrial Ecological Sciences, University of Occupational  
28 and Environmental Health, Japan, 1-1 Iseigaoka, Yahatanishi-ku, Kitakyushu 807-8555,  
29 Japan.

30 Email: tomohisa@med.uoeh-u.ac.jp; Tel: +81-93-603-1611; Fax: +81-93-603-2155

31

32

33

34

35

36

37

38

39

40

41

42

43

44

45

46

47

48

49 **Abstract**

50 **Background:** It is important to achieve herd immunity by vaccinating as many people  
51 as possible to end the COVID-19 pandemic. We investigated the relationship between  
52 willingness to receive vaccination and sources of health information among those who  
53 did not want to be vaccinated against COVID-19.

54 **Methods:** This prospective cohort study collected data using a self-administered  
55 questionnaire survey. The baseline survey was conducted during December 22–25, 2020,  
56 and the follow-up survey during February 18–19, 2021. Participants were aged 20–65  
57 years and worked at the time of the baseline survey (N = 33,087). After excluding 6,051  
58 invalid responses, we included responses from 27,036 participants at baseline. In total,  
59 19,941 people responded to the follow-up survey (74% follow-up rate). We excluded  
60 7,415 participants who answered “yes” to the question “If a COVID-19 vaccine  
61 becomes available, would you like to get it?” in the baseline survey. We finally analyzed  
62 12,526 participants.

63 **Results:** The odds ratio for change in willingness to be vaccinated from “no” to “yes”  
64 differed by source of health information. Compared with workers that used TV as a  
65 source of information, significantly fewer people who reported getting information from  
66 the Internet and friends/colleagues were willing to get the vaccine.

67 **Conclusions:** It is important to approach workers who do not watch TV when  
68 implementing workplace vaccination programs. It is likely that willingness to be  
69 vaccinated can be increased through an active company policy whereby the top  
70 management recommend vaccination, coupled with an individual approach by  
71 occupational health professionals.

72

73 **Trial registration:** Not applicable.

74 **Keywords:** COVID-19, Sources of health information, Vaccine hesitancy, Infodemic,

75 Workplace, Pandemic

76

77

78

79

80

81

82

83

84

85

86

87

88

89

90

91

92

93

94

95

96

97 **Introduction**

98 In Japan, vaccination against COVID-19 started for about 40,000 healthcare workers on  
99 February 17, 2021, in April 2021 for people aged  $\geq 65$  years, and on June 21, 2021, for  
100 workers in workplaces. Vaccination is voluntary and the decision whether to vaccinate  
101 is made by individuals [1]. Obtaining herd immunity through vaccination is important to  
102 end an infectious disease pandemic [2]. However, many people are hesitant to get  
103 vaccinated, and some refuse vaccination [3]. This vaccine hesitancy has become an  
104 important public health issue. In Japan, it is well known that there is a lack of public  
105 trust in vaccines [4].

106 Previous studies revealed factors related to willingness to receive the COVID-19  
107 vaccine. Age, gender, race, and education level were associated with vaccine hesitancy  
108 [5-7]. People are required to make their own decisions based on a full understanding of  
109 the risks associated with infectious diseases and the advantages/disadvantages of being  
110 vaccinated. They need to be able to obtain health information to inform their decisions  
111 regarding vaccination against emerging infectious diseases that may cause global  
112 pandemics. This is important because the COVID-19 vaccine is the first mRNA vaccine  
113 to be used worldwide.

114 There are various sources of information about vaccines, including TV, radio,  
115 newspapers, the Internet (e.g., websites, social networking services), friends/colleagues,  
116 and medical institutions/medical personnel. Workers who responded that they “trusted”  
117 these sources of information were significantly more likely to want to be vaccinated  
118 against COVID-19 [8]. Conversely, it has been reported that those who obtained  
119 information about the vaccine from social networking service were less likely to want to  
120 be vaccinated [9]. Although the Internet offers the advantage of sharing a large amount

121 of information quickly, it also has potential to spread false information, disinformation,  
122 and rumors during health emergencies, which hinders effective responses and creates  
123 confusion and mistrust [10]. The World Health Organization used the term “infodemic”  
124 to describe this situation. Infodemics, mainly disseminated through the Internet,  
125 including social networking services, have been reported to increase vaccine hesitancy  
126 [11-13]. However, no studies have clarified the impact of different sources of health  
127 information on people who are not willing to receive the COVID-19 vaccine.

128 The purpose of this study was to clarify the relationship between sources of health  
129 information and willingness to receive the COVID-19 vaccine among those who were  
130 not willing to get the vaccine as at the end of December 2020, which was during the  
131 third wave of infection in Japan.

132

## 133 **Methods**

### 134 **Study design and participants**

135 This prospective cohort study was conducted by a research group from the University of  
136 Occupational and Environmental Health, Japan. The project was named the  
137 Collaborative Online Research on Novel-coronavirus and Work (CORoNaWork) study.  
138 Data were collected using a self-administered online questionnaire survey delivered via  
139 the Internet survey company Cross Marketing Inc. (Tokyo, Japan). The baseline survey  
140 was conducted on December 22–25, 2020, and the follow-up survey on February 18–19,  
141 2021. In both periods, Japan was in the third wave of the COVID-19 pandemic, where  
142 the number of COVID-19 infections and deaths was markedly higher than in the first  
143 and second waves.

144 Details of the study protocol, including the sampling plan and participant

145 recruitment procedure, have been previously reported [14]. Participants were aged  
146 20–65 years and worked at the time of the baseline survey (N = 33,087). CORoNaWork  
147 study participants were stratified by sex, age, and region of residence using cluster  
148 sampling. After excluding 6,051 initial participants who provided invalid responses, we  
149 included 27,036 participants in the study database. These participants received a  
150 follow-up survey, to which 19,941 people responded (74% follow-up rate). We excluded  
151 7,415 participants who answered “yes” to the question “If a COVID-19 vaccine  
152 becomes available, would you like to get it?” in the baseline survey. We finally analyzed  
153 responses for 12,526 participants. Figure1 shows the flow diagram for this study.

154         The present study was approved by the Ethics Committee of the University of  
155 Occupational and Environmental Health, Japan (Approval number: R2-079 and R3-006).  
156 Informed consent was obtained from all participants.

157

### 158 **Assessment of intention to receive the COVID-19 vaccination**

159 In the follow-up survey, we asked participants, “Do you want to get the COVID-19  
160 vaccine?” Participants could choose one of four response options: “I want to,” “I want  
161 to a little,” “I do not really want to,” and “I do not want to.” Those who chose “I want to”  
162 or “I want to a little” were classified as being willing to receive the COVID-19 vaccine;  
163 other participants were classified as not willing.

164

### 165 **Source of health information**

166 In the follow-up survey, we asked participants, “Which medium do you use most to get  
167 information to protect your health?” Participants could choose one of seven options:  
168 TV; Internet; newspaper; radio; magazines; friends/colleges; and others.

169 **Assessment of covariates**

170 Covariates included demographics, socioeconomic factors, occupation, industry, and  
171 fear of COVID-19 transmission. Age was classified into five age groups: 20–29, 30–39,  
172 40–49, 50–59, and 60–65 years. Education was classified into three categories: junior  
173 high or high school, vocational school or college, and university or graduate school.  
174 Yearly household income was classified into four categories: <2.50 million Japanese  
175 yen (JPY), 2.50–3.74 million JPY, 3.75–5.24 million JPY, and ≥5.25 million JPY. We  
176 classified occupation into 10 categories: general employee; manager; executive  
177 manager; public employee, faculty member, or non-profit organization employee;  
178 temporary or contract employee; self-employed; small office/home office; agriculture,  
179 forestry, or fishing; professional occupation (e.g., lawyer, tax accountant,  
180 medical-related); and other occupations. Participants could choose one of 22 options for  
181 their work industry: energy, materials, industrial machinery; food; beverages/tobacco  
182 products; pharmaceuticals/medical supplies; cosmetics/toiletries/sanitary products;  
183 fashion and accessories; precision machinery and office supplies; home  
184 appliances/audio visual equipment; automobiles and transportation equipment;  
185 household goods; hobby/sporting goods; real estate and housing equipment; information  
186 and communication; wholesale and retail; finance/insurance; transportation and leisure;  
187 restaurant and other services; public offices and organizations; education, medical  
188 services, religion; mass media; market research; and others. These industries were then  
189 classified into nine categories based on the International Standard Industrial  
190 Classification of All Economic Activities: manufacturing; public service; information  
191 and communication; wholesale and retail; food service; medical and welfare; finance  
192 and insurance; construction; and others. To evaluate fear of COVID-19 transmission, we



193 asked participants, “Do you feel anxious about getting infected with COVID-19?” (Yes  
194 or No).

195 The cumulative incidence rate of COVID-19 infection in the prefecture of  
196 residence one month before the baseline survey was used as a community-level  
197 variable.

198

### 199 **Statistical analyses**

200 Multilevel logistic regression analyses were used to examine the associations between  
201 the source of health information and willingness to receive the COVID-19 vaccine.  
202 Age-sex adjusted odds ratios (ORs) and multivariate adjusted ORs were estimated with  
203 a multilevel logistic model nested in the prefecture of residence. The multivariate model  
204 was adjusted for age, sex, educational background, income, occupation, industry, and  
205 fear of COVID-19 transmission. A p-value less than 0.05 was considered statistically  
206 significant. All analyses were conducted using Stata (Stata Statistical Software release  
207 16; StataCorp LLC, TX, USA).

208

### 209 **Results**

210 Table 1 shows participants’ characteristics by the source of health information. The  
211 Internet was the most popular source of information, followed by TV, newspapers, and  
212 friends/colleagues. There was almost no difference between men and women for TV and  
213 the Internet, but newspapers, radio, and magazines were mostly used by men, whereas  
214 friends/colleagues were mostly used by women. Those who used the Internet,  
215 magazines, and friends/colleagues as information sources were more likely to be  
216 younger, whereas those who used TV, newspapers, and radio were more likely to be

217 older. Those who used TV for information were more likely to be willing to receive the  
 218 COVID-19 vaccine than those who used the Internet, newspapers, and  
 219 friends/colleagues.

220 Table 1. Characteristics of the study population by information source

|                                                                         | TV          | Internet    | Newspaper   | Radio      | Friends and colleagues | Other      |
|-------------------------------------------------------------------------|-------------|-------------|-------------|------------|------------------------|------------|
|                                                                         | n(%)        | n(%)        | n(%)        | n(%)       | n(%)                   | n(%)       |
| Total                                                                   | 3586        | 7299        | 522         | 137        | 396                    | 586        |
| Sex                                                                     |             |             |             |            |                        |            |
| Men                                                                     | 1810 (50.5) | 3756 (51.5) | 366 (70.1)  | 101 (73.7) | 152 (38.4)             | 348 (59.4) |
| Age (years)                                                             |             |             |             |            |                        |            |
| 20–29                                                                   | 149 (4.2)   | 477 (6.5)   | 9 (1.7)     | 1 (0.7)    | 30 (7.6)               | 36 (6.1)   |
| 30–39                                                                   | 523 (14.6)  | 1419 (19.4) | 43 (8.2)    | 14 (10.2)  | 72 (18.2)              | 111 (18.9) |
| 40–49                                                                   | 1029 (28.7) | 2404 (32.9) | 150 (28.7)  | 39 (28.5)  | 135 (34.1)             | 170 (29.0) |
| 50–59                                                                   | 1386 (38.7) | 2301 (31.5) | 222 (42.5)  | 58 (42.3)  | 117 (29.5)             | 215 (36.7) |
| 60–65                                                                   | 499 (13.9)  | 698 (9.6)   | 98 (18.8)   | 25 (18.2)  | 42 (10.6)              | 54 (9.2)   |
| Education                                                               |             |             |             |            |                        |            |
| Junior high or high school                                              | 1081 (30.1) | 1850 (25.3) | 121 (23.2)  | 38 (27.7)  | 108 (27.3)             | 191 (32.6) |
| Vocational school or college                                            | 930 (25.9)  | 1673 (22.9) | 87 (16.7)   | 28 (20.4)  | 116 (29.3)             | 124 (21.2) |
| University or graduate school                                           | 1575 (43.9) | 3776 (51.7) | 314 (60.2)  | 71 (51.8)  | 172 (43.4)             | 271 (46.2) |
| Annually household income (million JPY)□                                |             |             |             |            |                        |            |
| <2.00                                                                   | 270 (7.5)   | 500 (6.9)   | 29 (5.6)    | 21 (15.3)  | 28 (7.1)               | 70 (11.9)  |
| 2.00–3.99                                                               | 800 (22.3)  | 1493 (20.5) | 79 (15.1)   | 29 (21.2)  | 95 (24.0)              | 132 (22.5) |
| 4.00–5.99                                                               | 866 (24.1)  | 1804 (24.7) | 117 (22.4)  | 33 (24.1)  | 86 (21.7)              | 131 (22.4) |
| 6.00–7.99                                                               | 673 (18.8)  | 1458 (20.0) | 120 (23.0)  | 20 (14.6)  | 79 (19.9)              | 113 (19.3) |
| 8.00–9.99                                                               | 470 (13.1)  | 894 (12.2)  | 69 (13.2)   | 17 (12.4)  | 41 (10.4)              | 56 (9.6)   |
| ≥ 10.00                                                                 | 507 (14.1)  | 1150 (15.8) | 108 (20.7%) | 17 (12.4)  | 67 (16.9)              | 84 (14.3)  |
| Occupation                                                              |             |             |             |            |                        |            |
| General employee                                                        | 1620 (45.2) | 3452 (47.3) | 180 (34.5)  | 70 (51.1)  | 196 (49.5)             | 250 (42.7) |
| Manager                                                                 | 311 (8.7)   | 675 (9.2)   | 69 (13.2)   | 10 (7.3)   | 20 (5.1)               | 45 (7.7)   |
| Executive manager                                                       | 100 (2.8)   | 216 (3.0)   | 29 (5.6)    | 3 (2.2)    | 9 (2.3)                | 17 (2.9)   |
| Public employee, faculty member, or non-profit organization employee    | 341 (9.5)   | 711 (9.7)   | 85 (16.3)   | 15 (10.9)  | 35 (8.8)               | 42 (7.2)   |
| Temporary contract employee                                             | 439 (12.2)  | 763 (10.5)  | 50 (9.6)    | 12 (8.8)   | 35 (8.8)               | 59 (10.1)  |
| Self employed                                                           | 382 (10.7)  | 687 (9.4)   | 53 (10.2)   | 17 (12.4)  | 43 (10.9)              | 69 (11.8)  |
| SOHO                                                                    | 59 (1.6)    | 141 (1.9)   | 5 (1.0)     | 0 (0.0)    | 4 (1.0)                | 12 (2.0)   |
| Agriculture, forestry and fishery                                       | 30 (0.8)    | 63 (0.9)    | 3 (0.6)     | 0 (0.0)    | 3 (0.8)                | 11 (1.9)   |
| Professional occupation (e.g., lawyer, tax accountant, medical-related) | 211 (5.9)   | 393 (5.4)   | 34 (6.5)    | 3 (2.2)    | 34 (8.6)               | 48 (8.2)   |
| Other occupation                                                        | 93 (2.6)    | 198 (2.7)   | 14 (2.7)    | 7 (5.1)    | 17 (4.3)               | 33 (5.6)   |
| Industry category                                                       |             |             |             |            |                        |            |
| Manufacturing                                                           | 591 (16.5)  | 1246 (17.1) | 82 (15.7)   | 36 (26.3)  | 62 (15.7)              | 78 (13.3)  |
| Public service                                                          | 243 (6.8)   | 456 (6.2)   | 54 (10.3)   | 7 (5.1)    | 23 (5.8)               | 35 (6.0)   |
| Information and technology                                              | 185 (5.2)   | 443 (6.1)   | 22 (4.2)    | 6 (4.4)    | 10 (2.5)               | 32 (5.5)   |
| Retail and wholesale                                                    | 267 (7.4)   | 501 (6.9)   | 35 (6.7)    | 7 (5.1)    | 24 (6.1)               | 34 (5.8)   |
| Eating/drinking                                                         | 204 (5.7)   | 381 (5.2)   | 16 (3.1)    | 7 (5.1)    | 31 (7.8)               | 24 (4.1)   |
| Medical and welfare                                                     | 521 (14.5)  | 1077 (14.8) | 89 (17.0)   | 17 (12.4)  | 90 (22.7)              | 94 (16.4)  |
| Finance                                                                 | 177 (4.9)   | 300 (4.1)   | 25 (4.8)    | 5 (3.6)    | 15 (3.8)               | 22 (3.8)   |
| Construction                                                            | 144 (4.0)   | 276 (3.8)   | 25 (4.8)    | 5 (3.6)    | 13 (3.3)               | 11 (1.9)   |
| Other                                                                   | 1254 (35.0) | 2619 (35.9) | 174 (33.3)  | 47 (34.3)  | 128 (32.3)             | 254 (43.3) |
| Fear of COVID-19 transmission                                           |             |             |             |            |                        |            |
| Yes                                                                     | 2974 (82.9) | 5702 (78.1) | 393 (75.3)  | 96 (70.1)  | 291 (73.5)             | 328 (56.0) |
| Willingness to get the COVID-19 vaccine                                 |             |             |             |            |                        |            |
| Yes                                                                     | 2033 (56.7) | 3646 (50.0) | 278 (53.3)  | 67 (48.9)  | 168 (42.4)             | 201 (34.3) |

221 JPY, Japanese yen; SOHO, small office/home office.

222

223

224

225

226

227

228       Table 2 shows the associations between the source of health information and  
229 willingness to receive the COVID-19 vaccine. The age and sex adjusted analysis  
230 showed that compared with TV, significantly lower willingness to be vaccinated was  
231 associated with using the Internet (OR=0.78, 95% confidence interval [CI]: 0.72–0.85,  
232  $p<0.001$ ), newspapers (OR=0.82, 95% CI: 0.68–0.99,  $p=0.037$ ), radio (OR=0.69, 95%  
233 CI: 0.49–0.97,  $p=0.033$ ), and friends/colleagues (OR=0.58, 95% CI: 0.47–0.72,  
234  $p<0.001$ ) as sources of information. After adjusting for demographics, including  
235 socioeconomic factors, occupation, industry, and fear of COVID-19 transmission,  
236 associations between willingness to be vaccinated and using the Internet (OR=0.81,  
237 95% CI: 0.74–0.88,  $p<0.001$ ) and friends/colleagues (OR=0.62, 95% CI: 0.50–0.77,  
238  $p<0.001$ ) as information sources were still significantly lower than TV.

239

240

241

242

243

244

245

246

247

248

249

250

251 Table 2. Association between source of health information and willingness to receive the COVID-19 vaccine

| Source of health information | Sex and age adjusted |           |         | Multivariate adjusted* |           |         |
|------------------------------|----------------------|-----------|---------|------------------------|-----------|---------|
|                              | OR                   | 95% CI    | P value | OR                     | 95% CI    | P-value |
| TV                           | reference            |           |         | reference              |           |         |
| Internet                     | 0.78                 | 0.72 0.85 | <0.001  | 0.81                   | 0.74 0.88 | <0.001  |
| Newspaper                    | 0.82                 | 0.68 0.99 | 0.037   | 0.83                   | 0.68 1.00 | 0.056   |
| Radio                        | 0.69                 | 0.49 0.97 | 0.033   | 0.78                   | 0.55 1.12 | 0.181   |
| Friends and colleagues       | 0.58                 | 0.47 0.72 | <0.001  | 0.62                   | 0.50 0.77 | <0.001  |
| Other                        | 0.40                 | 0.33 0.48 | <0.001  | 0.51                   | 0.42 0.62 | <0.001  |

\* Adjusted for sex, age, education, income, occupation, industry, and fear of COVID-19 transmission.

OR, odds ratio; CI, confidence interval.

252

253

254

255

256

257

258

259

260

261 **Discussion**

262 The OR for the change in willingness to be vaccinated from “no” to “yes” differed by  
263 source of health information. Compared with workers who reported using TV as a  
264 source of information, those who reported getting information from the Internet and  
265 friends/colleagues had significantly lower ORs for willingness to receive the COVID-19  
266 vaccine.

267 Google publishes a relative percentage of the number of searches per week going  
268 back 1 year from the search date, with the highest value for that period being 100. At the  
269 time of the search for this study (June 29, 2021), the highest number of searches for  
270 “vaccine” was during June 13–19, 2021. The number of searches during that period was  
271 100, whereas the number of searches at the time of the first survey was 9, but increased  
272 to 28 at the time of the second survey [15]. This indicated that many Internet users were  
273 actively trying to find information about vaccines during this time. When searching for  
274 online health information on the Internet, people tend to select information that  
275 confirms their existing beliefs; this introduces the risk of confirmation bias, which  
276 results in a biased evaluation of the information [16]. In addition, because the  
277 information displayed changes depending on the search history, the information  
278 obtained is likely to be biased. If one tries to obtain negative information about vaccines  
279 from the outset, it is likely that one may acquire false information arising from the  
280 infodemic, and then continue to acquire similar information. This may result in  
281 increasing vaccine hesitancy.

282 Social networking services are an Internet-based source of information, but they  
283 have different characteristics from websites. When people obtain information from  
284 others via a social networking service, they tend to form groups with similar systems of

285 beliefs. This is because of the echo chamber effect, whereby an individual's opinions are  
286 amplified and strengthened by continuously seeing and hearing similar opinions [17,  
287 18]. Therefore, if people mainly obtain health information from social networking  
288 services, they may be strengthening their original vaccine hesitancy.

289 It has been reported that whether friends are vaccinated influences an individual's  
290 willingness to be vaccinated; if none of an individual's friends are vaccinated, it has a  
291 negative effect [19]. As the second survey for this study was conducted just after the  
292 vaccination of healthcare workers started, it is assumed that few friends/colleagues of  
293 our participants had been vaccinated. Their willingness to get the vaccine may therefore  
294 not have increased if they mainly received information from their friends or colleagues.  
295 Vaccination started in many areas after the second survey for this study, and people's  
296 willingness to get the vaccine may therefore have changed according to the vaccination  
297 status of surrounding friends.

298 The results of this study were consistent with those of other studies that found  
299 willingness to be vaccinated was higher in those that used TV as a source of health  
300 information<sup>11)</sup>. Information can be obtained passively from TV, and is widely  
301 disseminated to the indifferent population regardless of whether they have vaccine  
302 hesitancy. During the period of the second survey, there was an increase in TV coverage  
303 regarding vaccines because vaccination of healthcare workers had just started.  
304 Therefore, it is possible that the group that mainly received health information from TV  
305 changed from not wanting to be vaccinated to wanting vaccination.

306 Willingness to receive the vaccine has been identified as a crucial issue in the  
307 development of vaccination programs [20]. It is important that the approach to vaccine  
308 hesitancy is not uniform, and it is necessary to listen to the concerns of those with low

309 vaccination willingness in their individual contexts and implement appropriate  
310 communication [21]. As this survey targeted workers, it is also important to implement  
311 workplace-based approaches to increase willingness to be vaccinated and improve the  
312 vaccination rate. When implementing vaccination programs in the workplace, it is  
313 necessary to understand that different sources of health information may result in  
314 different attitudes toward vaccination, and to promote awareness of vaccination  
315 programs. Individual concerns can be clarified by confirming usual information sources,  
316 content, and vaccination preferences with the target population. Changes in vaccination  
317 willingness can be expected when occupational health professionals interview those  
318 who do not want to be vaccinated and provide guidance focused on their concerns.  
319 Routine provision of health-related information by occupational health professionals  
320 may enhance workers' health literacy and information choices, decisions, and actions.  
321 Furthermore, actively disseminating correct information via TV, websites, social  
322 networking services, other media (e.g., YouTube), and by occupational health  
323 professionals in the workplace may expand the options for correct information.

324       Regarding organizational factors and vaccination behavior in the workplace, it has  
325 been reported that organizational policies on vaccination can influence vaccination rates  
326 [22]. Therefore, when implementing a vaccination program for workers, a message from  
327 the top management of that company about vaccination and creating an environment  
328 that facilitates access to vaccination is recommended to protect workers' health and may  
329 increase the vaccination rate. It is also known that in workplaces where perceived  
330 organizational support exists, there is a sense of responsibility to the organization and  
331 altruistic behavior [23]. This means that employees will act to achieve group immunity  
332 to protect colleagues, which suggests that willingness to be vaccinated will increase.



333 Therefore, daily health promotion activities that increase perceived organizational  
334 support may also contribute to improving vaccination rates.

335 There were several limitations of this study that should be noted. First, the survey  
336 was conducted via an Internet panel. Because of the bias of the target population (a  
337 population with Internet access), the generalizability of the results is limited. Second,  
338 the timing of the survey might have impacted our results. In Japan, vaccination against  
339 COVID-19 began on February 17, 2021, for healthcare workers, in April 2021 for  
340 people aged  $\geq 65$  years, and on June 21, 2021, for people in workplaces. Because the  
341 trends in vaccination changed rapidly, careful consideration is needed to determine  
342 whether the present findings apply to all periods. Third, the causal relationship between  
343 the source of information and willingness to get the vaccine was not clear. But because  
344 this was a prospective cohort study, the influence of the temporal relationship between  
345 predictors and outcomes is likely to be strong. Finally, there is a common method bias.  
346 Further studies using objective records of whether people were actually vaccinated are  
347 needed.

348

### 349 **Conclusions**

350 This study suggests there is a difference in the change in willingness to receive the  
351 COVID-19 vaccine depending on the source of health information. Compared with the  
352 group that mainly obtains information from TV, those that obtain information from the  
353 Internet and friends/colleagues did not show increased willingness to be vaccinated. It is  
354 important to reach out to workers who do not watch TV when implementing vaccination  
355 programs in the workplace. It can be expected that the willingness to vaccinate people  
356 who do not wish to be vaccinated can be changed by an active policy whereby the top

357 management of a company recommend vaccination and implement an individual  
358 approach by occupational health professionals.

359

### 360 **Abbreviations**

361 COVID-19: coronavirus disease 2019; JPY: Japanese yen; OR: odds ratio; CI:  
362 confidence interval

363

364 **Figure1.** Flow diagram of this study

365

366

367

### 368 **Declarations**

369 **Ethical approval and consent to participate:** This study was approved by the Ethics  
370 Committee of the University of Occupational and Environmental Health, Japan  
371 (reference No. R2-079 and R3-006). Informed consent was obtained from all  
372 participants via the survey website.

373 **Consent for publication:** Not applicable.

374 **Availability of data and material:** For availability of data and material please contact  
375 the corresponding author.

376 **Competing interests:** The authors declare no conflicts of interest associated with this  
377 manuscript.

378 **Funding:** This study was supported and partly funded by the University of  
379 Occupational and Environmental Health, Japan; General Incorporated Foundation  
380 (Anshin Zaidan); The Development of Educational Materials on Mental Health

381 Measures for Managers at Small-sized Enterprises; Health, Labour and Welfare  
382 Sciences Research Grants; Comprehensive Research for Women's Healthcare  
383 (H30-josei-ippan-002); Research for the Establishment of an Occupational Health  
384 System in Times of Disaster (H30-roudou-ippan-007), scholarship donations from  
385 Chugai Pharmaceutical Co., Ltd., the Collabo-Health Study Group, and Hitachi Systems,  
386 Ltd.

387 **Authors' contributions:** KH; analysis and writing the manuscript, TN and TM;  
388 creating the questionnaire, analysis, drafting the manuscript and advice on interpretation,  
389 HA, AH, ST, MT, and SM; Review of manuscripts, and advice on interpretation, YF;  
390 overall survey planning, creating the questionnaire, and review of manuscripts, and  
391 advice on interpretation.

392 **Acknowledgements:** The current members of the CORoNaWork Project, in  
393 alphabetical order, are as follows: Dr. Yoshihisa Fujino (present chairperson of the study  
394 group), Dr. Akira Ogami, Dr. Arisa Harada, Dr. Ayako Hino, Dr. Hajime Ando, Dr.  
395 Hisashi Eguchi, Dr. Kazunori Ikegami, Dr. Kei Tokutsu, Dr. Keiji Muramatsu, Dr. Koji  
396 Mori, Dr. Kosuke Mafune, Dr. Kyoko Kitagawa, Dr. Masako Nagata, Dr. Mayumi Tsuji,  
397 Ms. Ning Liu, Dr. Rie Tanaka, Dr. Ryutaro Matsugaki, Dr. Seiichiro Tateishi, Dr. Shinya  
398 Matsuda, Dr. Tomohiro Ishimaru, and Dr. Tomohisa Nagata. All members are affiliated  
399 with the University of Occupational and Environmental Health, Japan.

400

401

## 402 **References**

403 1. Krantz I, Sachs L, Nilstun T. Ethics and vaccination. Scand J Public Health.  
404 2004;32:172-8. doi: 10.1080/14034940310018192.

- 405 2. Fine P, Eames K, Heymann DL. "Herd immunity": a rough guide. *Clin Infect Dis*.  
406 2011;52:911–6. doi.org/10.1093/cid/cir007.
- 407 3. Dubé E, Laberge C, Guay M, Bramadat P, Roy R, Bettinger J. Vaccine hesitancy: an  
408 overview. *Hum Vaccin Immunother*. 2013;9:1763-73. doi: 10.4161/hv.24657.
- 409 4. de Figueiredo A, Simas C, Karafillakis E, Paterson P, Larson HJ. Mapping global  
410 trends in vaccine confidence and investigating barriers to vaccine uptake: a  
411 large-scale retrospective temporal modelling study. *Lancet*. 2020; 396:898-908.  
412 doi:10.1016/s0140-6736(20)31558-0.
- 413 5. Malik AA, McFadden SM, Elharake J, Omer SB. Determinants of COVID-19  
414 vaccine acceptance in the US. *EClinicalMedicine*. 2020; 26:100495.  
415 doi:10.1016/j.eclinm.2020.100495.
- 416 6. Ishimaru T, Okawara M, Ando H, Hino A, Nagata T, Tateishi S, et al. Gender  
417 differences in the determinants of willingness to get the COVID-19 vaccine among  
418 the working-age population in Japan. *Hum Vaccin Immunother*. 2021 Jul 2;1-7. doi:  
419 10.1080/21645515.2021.1947098.
- 420 7. Reiter PL, Pennell ML, Katz ML. Acceptability of a COVID-19 vaccine among  
421 adults in the United States: How many people would get vaccinated? *Vaccine*.  
422 2020; 38:6500-7. doi:10.1016/j.vaccine.2020.08.043.
- 423 8. The Employee Cohort Study in the Covid-19 pandemic in Japan. Changes in  
424 Japanese workers' vaccination intentions from February to March 2021 and the  
425 relationship between vaccination intentions and sources [In Japanese].  
426 <https://plaza.umin.ac.jp/heart/e-coco-j/08.shtml>. Accessed 6 July, 2021.
- 427 9. Jennings W, Stoker G, Bunting H, Valgarðsson VO, Gaskell J, Devine D, et al.  
428 Lack of Trust, Conspiracy Beliefs, and Social Media Use Predict COVID-19

- 429 Vaccine Hesitancy. *Vaccines* (Basel). 2021;9:593. doi:10.3390/vaccines9060593.
- 430 10. World Health Organization. About EPI-WIN.  
431 <https://www.who.int/teams/risk-communication/about-epi-win>. Accessed 6 July,  
432 2021.
- 433 11. Hernandez RG, Hagen L, Walker K, O'Leary H, Lengacher C. The COVID-19  
434 vaccine social media infodemic: healthcare providers' missed dose in addressing  
435 misinformation and vaccine hesitancy. *Hum Vaccin Immunother*. 2021;1-3. doi:  
436 10.1080/21645515.2021.1912551.
- 437 12. Germani F, Biller-Andorno N. The anti-vaccination infodemic on social media: A  
438 behavioral analysis. *PLoS One*. 2021;16:e0247642. doi:  
439 10.1371/journal.pone.0247642.
- 440 13. Farooq F, Rathore FA. COVID-19 Vaccination and the Challenge of Infodemic and  
441 Disinformation. *J Korean Med Sci*. 2021;36:e78. doi: 10.3346/jkms.2021.36.e78.
- 442 14. Fujino Y, Ishimaru T, Eguchi H, Tsuji M, Tateishi S, Ogami A, et al. Protocol for a  
443 nationwide Internet-based health survey in workers during the COVID-19  
444 pandemic in 2020. *J UOEH*. 2021;43(2):217-225. doi: 10.7888/juoeh.43.217.
- 445 15. Google Trends [In Japanese].  
446 <https://trends.google.co.jp/trends/explore?q=%E3%83%AF%E3%82%AF%E3%83%81%E3%83%B3&geo=JP&cat=174#TIMESERIES>. Accessed 29 June 2021.
- 448 16. Meppelink CS, Smit EG, Fransen ML, Diviani N. "I was Right about Vaccination":  
449 Confirmation Bias and Health Literacy in Online Health Information Seeking. *J*  
450 *Health Commun*. 2019;24:129-140. doi: 10.1080/10810730.2019.1583701.
- 451 17. Brugnoli E, Cinelli M, Quattrociocchi W, Scala A. Recursive patterns in online  
452 echo chambers. *Sci Rep*. 2019;9:20118. doi: 10.1038/s41598-019-56191-7.

- 453 18. Cinelli M, De Francisci Morales G, Galeazzi A, Quattrocioni W, Starnini M. The  
454 echo chamber effect on social media. *Proc Natl Acad Sci U S A*.  
455 2021;118:e2023301118. doi: 10.1073/pnas.2023301118.
- 456 19. Seanehia J, Treibich C, Holmberg C, Müller-Nordhorn J, Casin V, Raude J, et al.  
457 Quantifying population preferences around vaccination against severe but rare  
458 diseases: A conjoint analysis among French university students, 2016. *Vaccine*.  
459 2017;35:2676-2684. doi: 10.1016/j.vaccine.2017.03.086.
- 460 20. Sallam M. COVID-19 Vaccine Hesitancy Worldwide: A Concise Systematic  
461 Review of Vaccine Acceptance Rates. *Vaccines (Basel)*. 2021;9:160.  
462 doi:10.3390/vaccines9020160.
- 463 21. Razai MS, Chaudhry UAR, Doerholt K, Bauld L, Majeed A. Covid-19 vaccination  
464 hesitancy. *BMJ*. 2021;373:n1138. doi: 10.1136/bmj.n1138.
- 465 22. Isaacson N, Roemheld-Hamm B, Crosson JC, Diccio-Bloom B, Winston CA.  
466 Organizational culture influences health care workers' influenza immunization  
467 behavior. *Fam Med*. 2009;41:202-7.
- 468 23. Kobayashi Y, Nagata T, Fujino Y, Hino A, Tateishi S, Ogami A, et al.  
469 Cross-sectional study of the association between perceived organizational support  
470 and COVID-19 vaccine intention. *medRxiv*. doi.org/10.1101/2021.05.07.21256839.
